# Supplementary material
Source: PubMed Central journal article supplement (PMC3719765)
Supplement: AAC.00512-13_zac999102038so1.pdf [file AAC.00512-13_zac999102038so1.pdf]

**Post-PKS tailoring steps of the spiramycin  
macrolactone ring in *Streptomyces ambofaciens***

Hoang-Chuong NGUYEN, Emmanuelle DARBON, Robert THAI, Jean-Luc PERNODET, Sylvie  
LAUTRU

SUPPLEMENTARY DATA

**Figure S1 : Structures of A) tylosin and B) rosamicin.** The C<sub>20</sub> carbons modified by Tyll (tylosin) or RosC (rosamicin) are indicated.

**A**

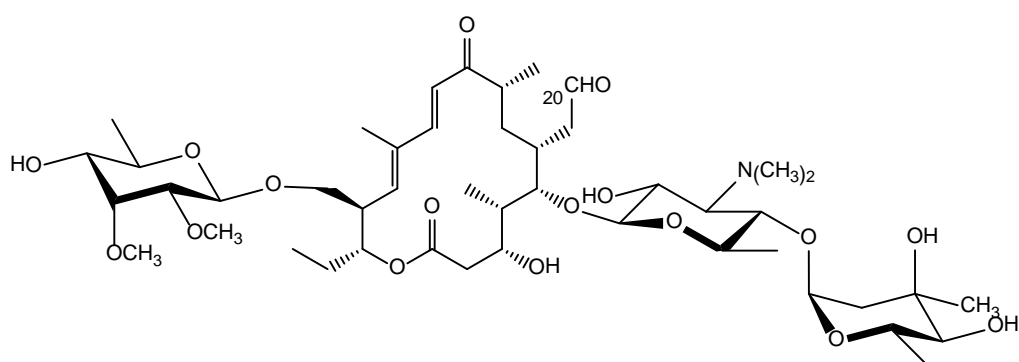

**B**

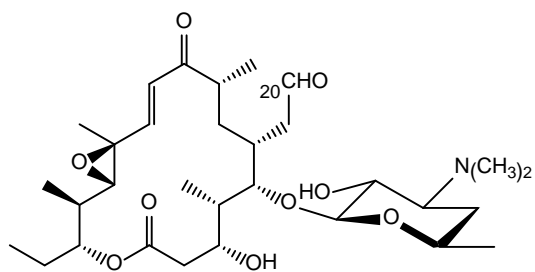

**Figure S2: Identification of the metabolites 10, 11 and 12 (Figures 2C and 2D) by MS and MS-MS.** A) MS and MS-MS fragmentation of peak 10 (C<sub>19</sub> methyl-spiramycin I, labeled 1 (m/z = 415.5) in MS spectrum) B) MS and MS-MS fragmentation of peak 11 (C<sub>19</sub> methyl-spiramycin II labeled 1 (m/z = 436.5) in MS spectrum) and C) MS and MS-MS fragmentation of peak 12 (C<sub>19</sub> methyl-spiramycin III, labeled 1 (m/z = 443.5) in MS spectrum).

**A**

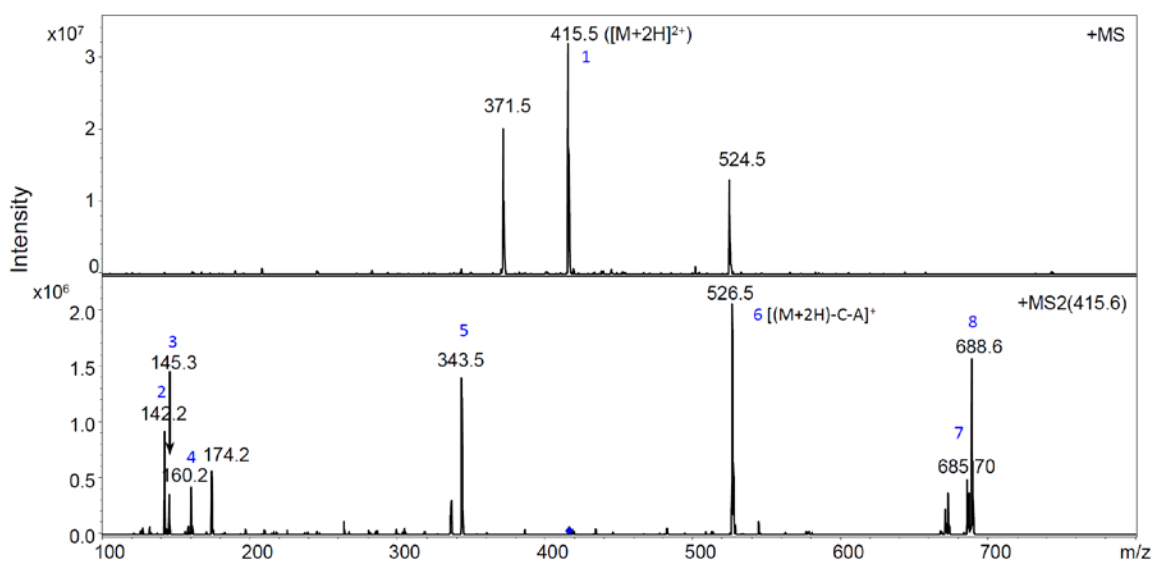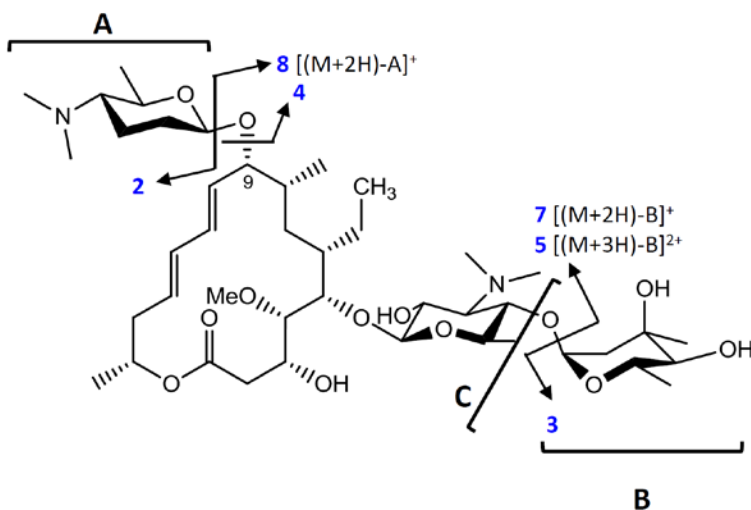

**1**  $[M+2H]^{2+}$ : m/z = 415.25

**B**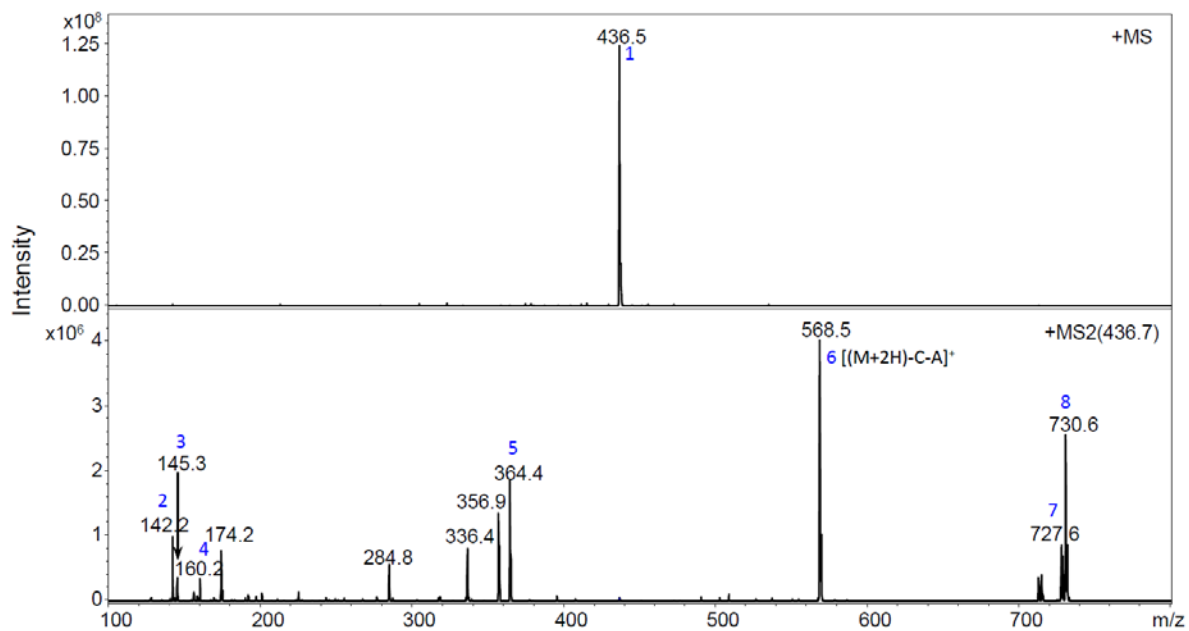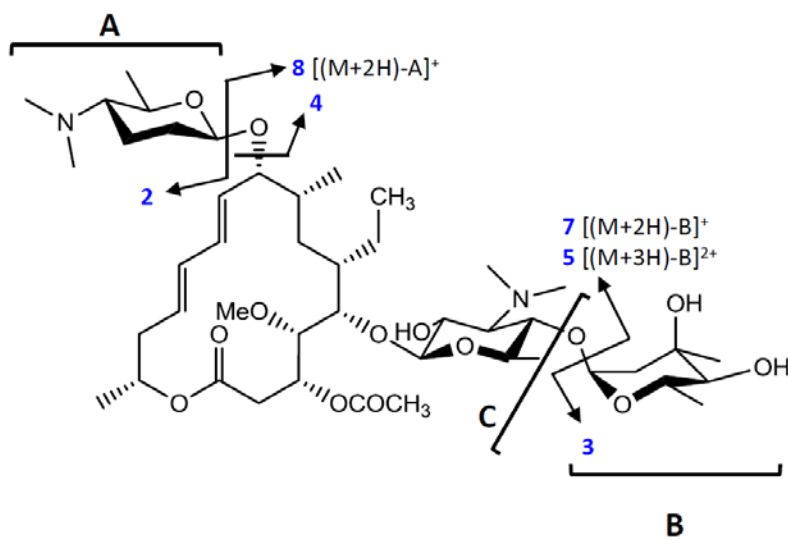

1 [M+2H]<sup>2+</sup>:  $m/z = 436.28$

C

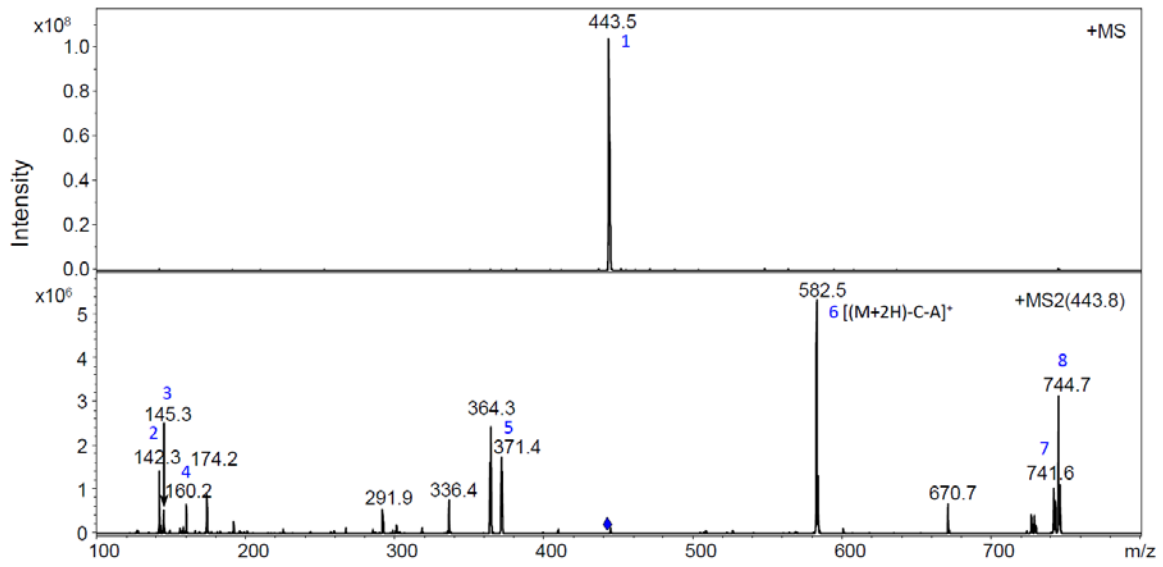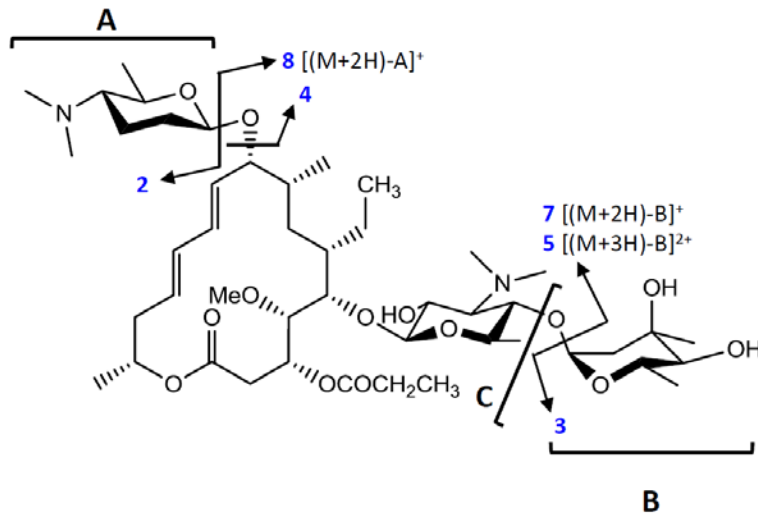

1 [M+2H]<sup>2+</sup>: m/z = 443.28

**Figure S3: LC and LC-MS analyses of the *srm43* (SPM543) and the *srm42* deletion mutant (SPM225) culture supernatants.** a) UV and b) EIC traces of  $m/z = 422.2$  ( $[M+2H]^{2+}$ , [6]),  $m/z = 443.2$  ( $[M+2H]^{2+}$ , [7]) and  $m/z = 450.2$  ( $[M+2H]^{2+}$ , [8]) for SPM543, and c) UV and d) EIC traces of  $m/z = 422.2$  ( $[M+2H]^{2+}$ , [6]),  $m/z = 443.2$  ( $[M+2H]^{2+}$ , [7]) and  $m/z = 450.2$  ( $[M+2H]^{2+}$ , [8]) for SPM225. Peak numbers correspond to molecule numbers in Figure 1

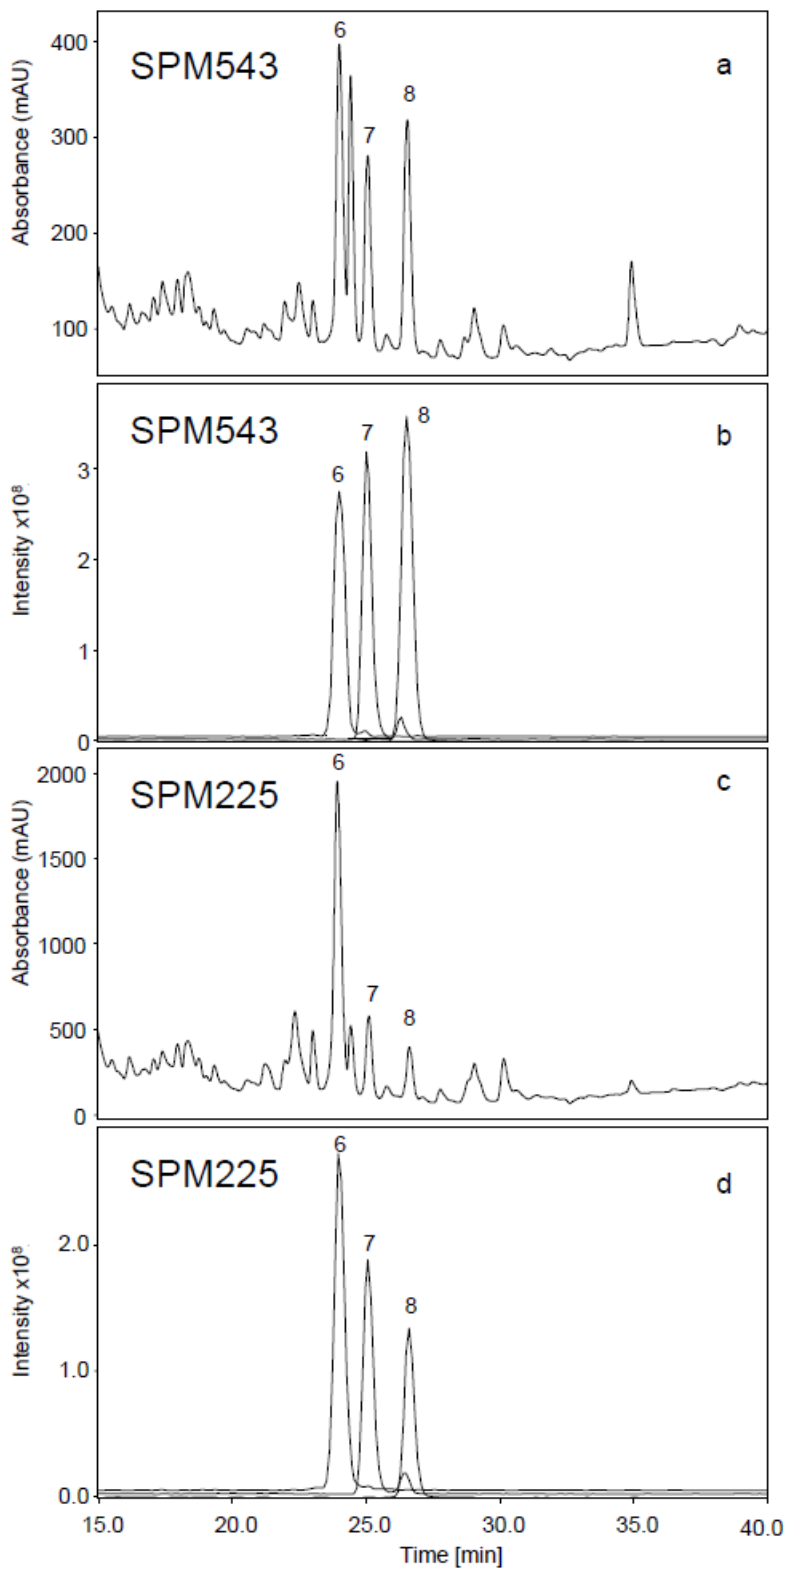

**Figure S4 : Structure of spiramycin IV**

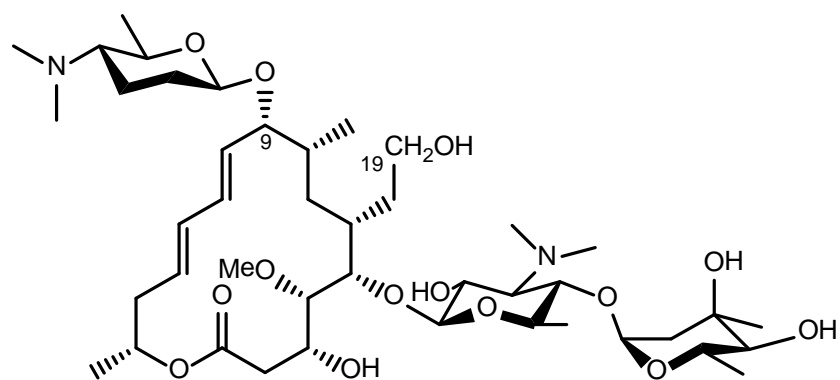

**Table S1: Strains and plasmids used in this study**

| <b>Strains</b>                   | <b>Description</b>                                                                                                                                                                     | <b>Source/Reference</b> |
|----------------------------------|----------------------------------------------------------------------------------------------------------------------------------------------------------------------------------------|-------------------------|
| <b><i>Escherichia coli</i></b>   |                                                                                                                                                                                        |                         |
| DH5 $\alpha$                     | General cloning host strain                                                                                                                                                            | Promega                 |
| S17.1                            | Host strain for conjugation from <i>E. coli</i> to <i>S. ambofaciens</i>                                                                                                               | (1)                     |
| ET12567/pUZ8002                  | Host strains for conjugation from <i>E. coli</i> to <i>Streptomyces</i>                                                                                                                | (2)                     |
| KS272/pKOBEG                     | Strain used for PCR-targeting by $\lambda$ RED-mediated recombination                                                                                                                  | (3)                     |
| <i>M. luteus</i> Cg <sup>R</sup> | Mutant strain of <i>M. luteus</i> DSM1790, resistant to congocidine                                                                                                                    | (4)                     |
| <b><i>Streptomyces</i></b>       |                                                                                                                                                                                        |                         |
| OSC2                             | <i>S. ambofaciens</i> strain derived from ATCC23877 devoid of pSAM2                                                                                                                    | (5)                     |
| SPM108                           | $\Delta srm29::aat3$ in OSC2                                                                                                                                                           | (6)                     |
| SPM121                           | $\Delta srm5::aat3$ in OSC2                                                                                                                                                            | (6)                     |
| SPM212                           | $\Delta srm28::aat2$ in OSC2                                                                                                                                                           | (6)                     |
| SPM225                           | $\Delta srm42::att2aac$ in OSC2                                                                                                                                                        | This study              |
| SPM234                           | $\Delta srm26::att2aac$ in OSC2                                                                                                                                                        | This study              |
| SPM235                           | $\Delta srm26::att2$ in OSC2                                                                                                                                                           | This study              |
| SPM512                           | $\Delta srm13::att3aac$ in OSC2                                                                                                                                                        | This study              |
| SPM513                           | $\Delta srm13::att3$ in OSC2                                                                                                                                                           | This study              |
| SPM514                           | $\Delta srm13::att3aac, srm26::att2$ in OSC2                                                                                                                                           | This study              |
| SPM515                           | $\Delta srm13::att3, srm26::att2$ in OSC2                                                                                                                                              | This study              |
| SPM543                           | $\Delta srm43::att3aac$ in OSC2                                                                                                                                                        | This study              |
| <b>Plasmids</b>                  |                                                                                                                                                                                        |                         |
| <b>Plasmids</b>                  | <b>Description</b>                                                                                                                                                                     | <b>Source/Reference</b> |
| pWED2                            | Amp <sup>R</sup> , Pur <sup>R</sup> , <i>oriT</i> , <i>E. coli</i> cosmid used for construction of the <i>S. ambofaciens</i> genomic library.                                          | (7)                     |
| pOSV206                          | Amp <sup>R</sup> , Apr <sup>R</sup> , <i>oriT</i> , <i>E. coli-Streptomyces</i> shuttle plasmid for gene expression in <i>Streptomyces</i> , derived from pUWL201                      | This study              |
| pOSV234                          | Amp <sup>R</sup> , Apr <sup>R</sup> , <i>E. coli-Streptomyces</i> shuttle plasmid, source of the <i>att3aac</i> cassette                                                               | (8)                     |
| pOSV236                          | Amp <sup>R</sup> , Pur <sup>R</sup> , <i>oriT</i> , <i>E. coli-Streptomyces</i> shuttle plasmid expressing the Xis and Int proteins for site-specific excision of excisable cassettes. | (6)                     |
| pSPM266                          | Coding region of <i>srm26</i> cloned into pOSV206                                                                                                                                      | This study              |
| pSPM36                           | DNA fragment containing the region of spiramycin cluster spanning from <i>srm24</i> to the end of the cluster cloned in pWED2                                                          | (7)                     |
| pSPM265                          | DNA fragment containing the <i>att2aac</i> cassette inserted in <i>srm42</i> cloned in pWED2                                                                                           | This study              |
| pSPM267                          | DNA fragment containing the <i>att2aac</i> cassette inserted in <i>srm26</i> cloned in pWED2                                                                                           | This study              |
| pSPM543                          | pSPM36 containing the <i>att3aac</i> cassette inserted in <i>srm43</i>                                                                                                                 | This study              |
| pSPM573                          | DNA fragment containing the <i>att3aac</i> cassette inserted in <i>srm13</i> cloned in pWED2                                                                                           | This study              |



**Table S2: Oligonucleotides used in this study.**

| Name      | Sequence                                                                           | Description                                                                                                               |
|-----------|------------------------------------------------------------------------------------|---------------------------------------------------------------------------------------------------------------------------|
| SRM5      | ATAAAGCTTGCGAGGAACTCGATGCCG                                                        | Forward primer for amplification of the left-flanking sequence of <i>srm42</i>                                            |
| SRM6      | ATAAGATCTACTGCGCCAGCTCACCG                                                         | Reverse primer for amplification of the left-flanking sequence of <i>srm42</i>                                            |
| SRM7      | ATAAGATCTTCATCGCCACGACGTCCA                                                        | Forward primer for amplification of the right-flanking sequence of <i>srm42</i>                                           |
| SRM8      | ATAGATATCGCACCTCGTCCAGCTGCT                                                        | Reverse primer for amplification of the right-flanking sequence of <i>srm42</i>                                           |
| SRM9      | ATAAAGCTTCCGGATCGAGGAGTTCAC<br>C                                                   | Forward primer for amplification of the left-flanking sequence of <i>srm26</i> .                                          |
| SRM10     | ATAGATATCAGTGCCTCGGCGGCGAAG                                                        | Reverse primer for amplification of the left-flanking sequence of <i>srm26</i>                                            |
| SRM11     | ATAGATATCTGAGCCGGGAGAAGGAG<br>CTG                                                  | Forward primer for amplification of the right-flanking sequence of <i>srm26</i>                                           |
| SRM12     | ATAGCTAGCGAAGTCCGCCGTCAGGTC<br>GAG                                                 | Reverse primer for amplification of the right-flanking sequence of <i>srm26</i>                                           |
| SRM13     | ATAAAGCTTCCCTGACCCGTGAACAACA<br>CC                                                 | Forward primer for amplification of the left-flanking sequence of <i>srm13</i>                                            |
| SRM14     | ATAGATATCCGGGCGTCCGCGTCCTTG                                                        | Reverse primer for amplification of the left-flanking sequence of <i>srm13</i>                                            |
| SRM15     | ATAGATATCACCAGCTCACTCCGAAGT<br>ACC                                                 | Forward primer for amplification of the right-flanking sequence of <i>srm13</i>                                           |
| SRM16     | ATAGCTAGCTCGGCGTAGGTGATGTCC<br>AG                                                  | Reverse primer for amplification of the right-flanking sequence of <i>srm13</i>                                           |
| EDR71     | <u>CGTCATCGACGTGCGGGGAAGACAGA</u><br><u>GGTGATACCGATGCATCGCGCGCGCT</u><br>TCGTTCGG | PCR-targeting of <i>srm43</i> . The sequence identical to the beginning of the <i>srm43</i> coding sequence is underlined |
| EDR72     | <u>GGGGGTGAGTTCCGTCGAGCAGCTGG</u><br><u>ACGAGGTGCTGGCATCTGCCTCTTCGT</u><br>CCCGAA  | PCR-targeting of <i>srm43</i> . The sequence identical to the end of the <i>srm43</i> coding sequence is underlined       |
| OE.srm26F | ATAAAGCTTTGGGGGTTTCGAGAGCGT<br>TC                                                  | Forward primer for amplification of <i>srm26</i> coding sequence                                                          |
| OE.srm26R | ATAGAATTCCCGAGACCTTCACCGTGT<br>AG                                                  | Reverse primer for amplification of <i>srm26</i> coding sequence                                                          |

**Construction of the pOSV206 vector**

To construct pOSV206, the 1.7 kb *Bam*HI/*Hind*III/Klenow fragment from pPAOI6 (9) was ligated with pULW201 (10) digested with *Pvu*II. Orientation of the insert was determined by digesting the resulting plasmids with *Xba*I and *Sal*I.

**References**

1. **Simon R, Priefer U, Pühler A.** 1983. A Broad Host Range Mobilization System for *In Vivo* Genetic Engineering: Transposon Mutagenesis in Gram Negative Bacteria. *Nature Biotechnology* **1**:784–791.
2. **Gust B, Chandra G, Jakimowicz D, Yuqing T, Bruton CJ, Chater KF.** 2004. Lambda red-mediated genetic manipulation of antibiotic-producing *Streptomyces*. *Adv. Appl. Microbiol.* **54**:107–128.

3. **Chaveroche MK, Ghigo JM, D' Enfert C.** 2000. A rapid method for efficient gene replacement in the filamentous fungus *Aspergillus nidulans*. *Nucleic Acids Res.* **28**:E97.
4. **Gourmelen A, Blondelet-Rouault MH, Pernodet JL.** 1998. Characterization of a glycosyl transferase inactivating macrolides, encoded by *gimA* from *Streptomyces ambofaciens*. *Antimicrob. Agents Chemother.* **42**:2612–2619.
5. **Raynal A, Karray F, Tuphile K, Darbon-Rongère E, Pernodet J-L.** 2006. Excisable cassettes: new tools for functional analysis of *Streptomyces* genomes. *Appl. Environ. Microbiol.* **72**:4839–4844.
6. **Nguyen HC, Karray F, Lautru S, Gagnat J, Lebrihi A, Huynh TDH, Pernodet J-L.** 2010. Glycosylation steps during spiramycin biosynthesis in *Streptomyces ambofaciens*: involvement of three glycosyltransferases and their interplay with two auxiliary proteins. *Antimicrob. Agents Chemother.* **54**:2830–2839.
7. **Karray F, Darbon E, Oestreicher N, Dominguez H, Tuphile K, Gagnat J, Blondelet-Rouault M-H, Gerbaud C, Pernodet J-L.** 2007. Organization of the biosynthetic gene cluster for the macrolide antibiotic spiramycin in *Streptomyces ambofaciens*. *Microbiology (Reading, Engl.)* **153**:4111–4122.
8. **Karray F.** 2005. Etude de la biosynthèse de l'antibiotique spiramycine par *Streptomyces ambofaciens*. Université Paris-Sud 11, Orsay.
9. **Nalin R, Pujic P, Tuphile K, Gillet B.** 2004. Brevet EP1386966A1 - Method for the expression of unknown environmental DNA into adapted host cells.
10. **Doumith M, Weingarten P, Wehmeier UF, Salah-Bey K, Benhamou B, Capdevila C, Michel JM, Piepersberg W, Raynal MC.** 2000. Analysis of genes involved in 6-deoxyhexose biosynthesis and transfer in *Saccharopolyspora erythraea*. *Mol. Gen. Genet.* **264**:477–485.
